# Posttransplant lymphoproliferative disorders in kidney transplant recipients: a retrospective cohort analysis over two decades in Hong Kong

Chi Yuen Cheung<sup>1</sup>, Maggie Kam Man Ma<sup>2</sup>, Ka Foon Chau<sup>1</sup>, Wai Leung Chak<sup>1</sup> and Sydney Chi Wai Tang<sup>2</sup>

<sup>1</sup>Renal Unit, Department of Medicine, Queen Elizabeth Hospital, Hong Kong SAR, China

<sup>2</sup>Division of Nephrology, Department of Medicine, The University of Hong Kong, Queen Mary Hospital, Hong Kong SAR, China

**Correspondence to:** Sydney Chi Wai Tang, **email:** scwtang@hku.hk

**Keywords:** lymphoma, posttransplant lymphoproliferative disorders, kidney transplant

**Received:** February 22, 2017

**Accepted:** June 04, 2017

**Published:** June 30, 2017

**Copyright:** Cheung et al. This is an open-access article distributed under the terms of the Creative Commons Attribution License 3.0 (CC BY 3.0), which permits unrestricted use, distribution, and reproduction in any medium, provided the original author and source are credited.

## ABSTRACT

**Objective:** To characterize the posttransplant lymphoproliferative disorders (PTLD) including the Epstein-Barr virus (EBV) status, histological subgroups, site of occurrence and the clinical outcome in the Chinese kidney transplant recipients.

**Methods:** A retrospective cohort study of 1, 227 adult kidney transplant recipients who were followed up in two transplant centers in Hong Kong over two decades.

**Results:** 23 (1.9%) patients developed PTLD. Median duration from transplant to PTLD was 104 (5-252) months. Six patients (26.1%) had early PTLD and 17 (73.9%) had late PTLD. Ten (43%) developed PTLD >10 years after transplant. All patients in early PTLD group were EBV-positive. In the late PTLD group, 60% were EBV-negative and 40% EBV-positive. More than 90% of cases were monomorphic PTLD with majority being diffuse large B cell lymphoma. Bone marrow was the most common extranodal site. The overall treatment response rate was 52.2 %. None of the patients developed rejection or relapse after PTLD. At a median follow-up of 9 (1-79) months after PTLD, 18 patients died. Patient survival was 48% at 1 year and 30% at 3 years and death-censored allograft survival was 82% at 1 year and 73% at 3 years.

**Conclusion:** Late PTLD is common. Careful adjustment of immunosuppression, close monitoring of patients, increased awareness and early detection of the disease are essential.

## INTRODUCTION

Posttransplant lymphoproliferative disorders (PTLD) represent a heterogeneous group of lymphoid and plasmacytic proliferative diseases, occurring as a result of immunosuppressive therapy in patients who have received solid organ or bone marrow transplantation [1]. The disease can occur in a wide range of locations, which may be limited to nodal disease or disseminated to involve a variety of extranodal sites including the bone marrow, central nervous system, gastrointestinal system and the transplanted allograft [2, 3]. Different studies have shown

that PTLD is one of the most common cancers in kidney transplant recipients. Moreover, presence of PTLD can reduce the patient and allograft survival [2-8].

Epstein-Barr virus (EBV) is a significant risk factor for the development of PTLD. However, a substantial portion of PTLD cases is not associated with EBV. The EBV-negative PTLD cases tend to occur late when compared with those EBV-positive cases [9]. It is still not known whether EBV-negative PTLD may actually represent another disease entity which requires more aggressive treatment. Previous studies showed conflicting data regarding the prognostic significance of the EBV

status in PTLD [2, 10-16]. In addition, the subjects in most of these studies were from a heterogeneous group involving both adult and pediatric patients and recipients of different types of solid organ. Furthermore, only very few studies of kidney transplant recipients with PTLD were recruited from the Asian population, especially the Chinese patients and these data are usually restricted to small case series [8, 17-19]. The difference in EBV seropositivity and HLA frequencies between the Western and Asian population might influence the incidence, pattern and treatment outcome of PTLD in different geographical areas [17, 18]. The aim of this study was to characterize the PTLD including the EBV status, histological subgroups, site of occurrence and the clinical outcome in the adult kidney transplant recipients in Hong Kong over two decades.

## RESULTS

Total 1, 227 kidney transplant recipients had follow-up within the study period and 23 (1.9%) of them developed PTLD. Among the PTLD patients, 13 were males and 10 were females. The mean age at transplant was 42.3 +/- 12.0 years. The median duration from transplant to onset of PTLD was 104 (5-252) months. Six patients (26.1% of all PTLD cases) were classified as early PTLD and the median duration from transplant to PTLD in these patients was 9 [5-11] months. On the other hand, 17 patients (73.9%) were classified as late PTLD and the median duration from transplant to PTLD was 154 (23-252) months. Ten patients (43%) developed PTLD more than 10 years after transplant. Total 4 patients received anti-thymocyte globulin before PTLD: 3 given as induction therapy and 1 as treatment of acute rejection. The baseline demographics and clinicopathologic features of patients with PTLD in our cohort were summarized in Tables 1 and 2.

EBV status of PTLD histology was available in 21 patients (2 patients with plasma cell myeloma had unknown EBV status). Twelve cases (57.1%) were positive for EBV; 9 being DLBCL, 1 being polymorphic PTLD, 1 being NK cell lymphoma and 1 being marginal zone lymphoma. On the other hand, 9 cases were negative for EBV (6 DLBCL, 1 mantle cell lymphoma, 1 peripheral T cell lymphoma and 1 Burkitt lymphoma). All 6 patients in early PTLD group were EBV-positive. In the late PTLD group, 60% (9/15) were EBV-negative and 40% (6/15) were EBV-positive. The baseline demographics and disease characteristics, categorized by EBV status, was shown in Table 3.

Most cases (91.3%) in our series were monomorphic PTLD with majority being diffuse large B cell lymphoma (DLBCL, n=15) (Table 1). On the other hand, none of the kidney transplant recipients developed classical Hodgkin lymphoma type PTLD. Lymph nodes were the most common location of PTLD (34.8%), followed by bone

marrow (30.4%), brain and gastrointestinal tract (17.4%). All patients except the one with nodal marginal zone lymphoma had extranodal involvement of PTLD. More patients (16/23, 69.6%) presented with late-stage (III or IV) PTLD than early-stage disease (7/23, 30.4%) in our cohort.

Reduction in immunosuppression was included as part of the first line therapy in all patients with PTLD. Among these patients, 11 patients had mTOR inhibitor conversion (7 converted to sirolimus and 4 to everolimus) together with CNI minimization or elimination. None of the patients suffered from any serious side effects of mTOR inhibitors. Two patients were treated with reduction in immunosuppression alone; including one patient (Patient 22) who was diagnosed with nodal marginal zone lymphoma (EBV-positive) and had complete regression of lesion, and one patient (Patient 19) who was too ill to receive other forms of treatment. Sixteen patients received chemotherapy. Rituximab treatment was administered, either alone or in combination with chemotherapy, in 12 patients. Four patients with brain or soft tissue involvement received radiotherapy and 5 patients required surgery (1 with graft PTLD received graft nephrectomy, 1 with spleen involvement had splenectomy and 3 with bowel involvement had laparotomy and bowel resection).

The overall treatment response rate (including complete and partial remission) was 52.2 (12/23) %. None of the patients had PTLD relapse within the study period. At a median follow-up of 9 (1-79) months after PTLD, 18 patients died (6 due to PTLD progression, 10 due to sepsis and 2 due to ischemic heart disease). The median duration from diagnosis of PTLD to death was 5 months (1 month to 49 months). Overall patient survival after diagnosis of PTLD was 48% at 1 year and 30% at 3 years. For those who died from cancer progression, 4 had DLBCL (3 of them with cerebral involvement), 1 had NK cell lymphoma, and 1 had plasma cell myeloma. Among the 15 patients who received mTOR inhibitors after PTLD (11 from conversion while 4 already on mTOR inhibitors before cancer), 11 patients died (9 due to sepsis, 1 due to ischemic heart disease, 1 due to cancer progression). On the other hand, 7 of the 8 patients who were not on mTOR inhibitors died (5 due to cancer progression, 1 due to sepsis and 1 due to ischemic heart disease). Five patients died of sepsis during the treatment of PTLD: 2 had *Pseudomonas aeruginosa* septicemia, 1 had extended-spectrum beta-lactamase-producing *Escherichia coli* septicemia, 1 had candidemia and 1 had *Pneumocystis carinii* pneumonia.

If we classified the patients according to the EBV status, there was no significant difference in patient survival between those with EBV-positive PTLD and EBV-negative PTLD (P=0.95). If we examined our cohort again according to the onset of disease, all 6 patients with early PTLD died. On the other hand, 5

**Table 1: Summary of the baseline demographics and clinicopathologic features of patients with post-transplant lymphoproliferative disorders**

|                                                  |                      |
|--------------------------------------------------|----------------------|
| Patients with PTLD                               | n=23                 |
| Male, n (%)                                      | 13 (56.5)            |
| Mean age at transplant (years)                   | 42.3 +/- 12.0        |
| Mode of dialysis, n (%)                          |                      |
| Peritoneal dialysis                              | 11 (47.8)            |
| Hemodialysis                                     | 6 (26.1)             |
| Preemptive treatment                             | 6 (26.1)             |
| ESKD cause, n (%)                                |                      |
| Glomerulonephritis                               | 13 (56.5)            |
| Hypertension                                     | 5 (21.7)             |
| Diabetes mellitus                                | 2 (8.7)              |
| Others                                           | 3 (13.1)             |
| Deceased / Living, n (%)                         | 20 (86.9) / 3 (13.1) |
| Year of transplantation                          |                      |
| 2000 or before                                   | 14 (60.9)            |
| 2001-2010                                        | 9 (39.1)             |
| 2011-2015                                        | 0 (0)                |
| Induction therapy, n (%)                         |                      |
| Anti-thymocyte globulin                          | 3 (13.0)             |
| Basiliximab                                      | 5 (21.7)             |
| None                                             | 15 (65.3)            |
| Maintenance immunosuppression, n (%)             |                      |
| Prednisolone                                     | 21 (91.3)            |
| Azathioprine                                     | 9 (39.1)             |
| Mycophenolatemofetil                             | 7 (30.4)             |
| Cyclosporine                                     | 17 (73.9)            |
| Tacrolimus                                       | 6 (26.1)             |
| Sirolimus                                        | 2 (8.7)              |
| Everolimus                                       | 2 (8.7)              |
| Rejection therapy before PTLD, n (%)             |                      |
| Yes                                              | 10 (43.5)            |
| No                                               | 13 (56.5)            |
| Mean age at PTLD (years)                         | 51.5 +/- 14.4        |
| Median duration from transplant to PTLD (months) | 104 (5-252)          |
| Year of PTLD                                     |                      |
| 2000 or before                                   | 4 (17.4)             |
| 2001-2010                                        | 5 (21.7)             |
| 2011-2015                                        | 14 (60.9)            |

*(Continued)*

|                                                |                      |
|------------------------------------------------|----------------------|
| Early PTLD / Late PTLD, n (%)                  | 6 (26.1) / 17 (73.9) |
| Stage I and II / Stage III and IV, n (%)       | 7 (30.4) / 16 (69.6) |
| Histological classification, n (%)             |                      |
| Polymorphic PTLD                               | 1 (4.3)              |
| Diffuse large B cell lymphoma                  | 15 (65.5)            |
| Burkitt lymphoma                               | 1 (4.3)              |
| NK cell lymphoma                               | 1 (4.3)              |
| T cell lymphoma                                | 1 (4.3)              |
| Mantle cell lymphoma                           | 1 (4.3)              |
| Plasma cell myeloma                            | 2 (8.7)              |
| Marginal zone lymphoma                         | 1 (4.3)              |
| Epstein-Barr virus status of the tissue, n (%) |                      |
| Positive                                       | 12 (52.1)            |
| Negative                                       | 9 (39.2)             |
| Not determined                                 | 2 (8.7)              |
| Location of PTLD, n (%)                        |                      |
| Lymph node                                     | 8 (34.8)             |
| Bone marrow                                    | 7 (30.4)             |
| Kidney graft                                   | 2 (8.7)              |
| Brain                                          | 4 (17.4)             |
| Gastrointestinal tract                         | 4 (17.4)             |
| Tonsil                                         | 2 (8.7)              |
| Liver                                          | 2 (8.7)              |
| Spleen                                         | 2 (8.7)              |
| Nasopharynx                                    | 3 (13.0)             |
| Others                                         | 3 (13.0)             |

Values expressed as mean  $\pm$ SD, median (range) or number (percentage).ESKD: end stage kidney disease; PTLD: post-transplant lymphoproliferative disorders.

patients with late PTLD survived at the end of the study (4 with DLBCL and 1 with marginal zone lymphoma). The median follow-up duration in these 5 survivors was 54 (29-79) months.

Four patients lost their grafts during the study period (1 had graft nephrectomy and the other 3 already had chronic allograft nephropathy with poor renal function before PTLD). None of the patients developed acute rejection after PTLD diagnosis and titration of immunosuppression. The death-censored allograft survival was 82% at 1year and 73% at 3 years.

## DISCUSSION

Our previous registry study has shown that non Hodgkin lymphoma (NHL) is the most common post-transplant cancers in the Chinese kidney transplant recipients in Hong Kong. The incidence rate of NHL is 1.2 cases per 1000 patient-years. Compared with the general population, we found approximately 15 times increased risk of NHL after kidney transplantation. Moreover, the mortality risk of NHL is also markedly elevated (standardized mortality ratio 18.2 with 95%

**Table 2: Clinicopathologic features and treatment outcome of individual patient with post-transplant lymphoproliferative disorders**

| Patent | Gender/age (Tx) | Primary disease | Histology   | EBV | Sites                                         | Time (month) | IS                           | Reject | Treatment (remission)    | Outcome (month)     |
|--------|-----------------|-----------------|-------------|-----|-----------------------------------------------|--------------|------------------------------|--------|--------------------------|---------------------|
| 1      | F/29            | GN              | DLBCL       | +   | graft                                         | 5            | Pred+Aza+CsA<br>ATG          | +      | Surgery (CR)             | Died (49)<br>IHD    |
| 2      | M/24            | HT              | DLBCL       | +   | brain                                         | 9            | Pred+CsA                     | +      | RT + CHOP<br>(NR)        | Died (6)<br>cancer  |
| 3      | M/57            | DM              | Polymorphic | +   | graft                                         | 9            | Pred+MMF+CsA                 | +      | R (PR)                   | Died (8)<br>sepsis  |
| 4      | M/25            | GN              | DLBCL       | +   | LN, NP                                        | 9            | Pred+Tac+Siro<br>Basiliximab | +      | R-CHOP (NR)              | Died (3)<br>sepsis  |
| 5      | F/49            | GN              | DLBCL       | +   | brain                                         | 10           | Pred+MMF+FK<br>ATG           | +      | RT (NR)                  | Died (4)<br>cancer  |
| 6      | M/43            | GN              | NK cell     | +   | BM, nasal<br>septum                           | 11           | Pred+Aza+CsA                 | +      | CHOP (NR)                | Died (2)<br>cancer  |
| 7      | M/36            | HT              | Mantle cell | -   | LN, BM,<br>liver,<br>spleen                   | 23           | Pred+MMF+Tac                 | -      | R-CHOP (PR)              | Died (13)<br>sepsis |
| 8      | M/42            | GN              | DLBCL       | -   | liver                                         | 45           | Pred+Aza+CsA<br>ATG          | -      | R-CHOP (CR)              | Alive (79)          |
| 9      | M/38            | GN              | T cell      | -   | BM, NP,<br>colon                              | 54           | Pred+MMF+Tac<br>Basiliximab  | +      | CHOP (NR)                | Died (14)<br>sepsis |
| 10     | F/54            | HT              | myeloma     | ND  | BM                                            | 68           | Pred+Aza+CsA<br>Basiliximab  | -      | Chemotherapy<br>(CR)     | Died (14)<br>IHD    |
| 11     | F/45            | unknown         | DLBCL       | -   | LN, small<br>bowel                            | 87           | Pred+MMF+Tac                 | -      | Surgery +<br>R-CHOP (PR) | Died (4)<br>sepsis  |
| 12     | F/69            | DM              | DLBCL       | -   | LN, NP,<br>BM                                 | 104          | Pred+CsA                     | -      | CHOP (NR)                | Died (3)<br>cancer  |
| 13     | F/45            | GN              | DLBCL       | +   | LN,<br>tonsils,<br>BM, soft<br>tissue<br>mass | 109          | Pred+Aza+CsA                 | -      | R-CHOP (CR)              | Alive (29)          |
| 14     | M/28            | GN              | DLBCL       | -   | BM,<br>spleen                                 | 139          | Pred+CsA                     | +      | Surgery +<br>R-CHOP (NR) | Died (1)<br>sepsis  |
| 15     | F/49            | GN              | DLBCL       | -   | LN,<br>tonsils                                | 154          | Pred+Aza+CsA                 | -      | R-CHOP (CR)              | Alive (50)          |
| 16     | F/40            | GN              | DLBCL       | +   | small<br>bowel,<br>colon                      | 163          | Pred+Tac+Ever<br>Basiliximab | +      | Surgery + R<br>(CR)      | Died (40)<br>sepsis |
| 17     | M/66            | HT              | myeloma     | ND  | BM                                            | 174          | Pred+CsA+Siro<br>Basiliximab | -      | Thalidomide<br>(NR)      | Died (15)<br>cancer |
| 18     | M/50            | GN              | DLBCL       | -   | LN, BM                                        | 192          | Pred+CsA                     | -      | R-chlorambucil<br>(NR)   | Died (1)<br>sepsis  |
| 19     | F/40            | GN              | DLBCL       | +   | brain                                         | 214          | Pred+MMF+CsA                 | -      | Conservative<br>(NR)     | Died (1)<br>cancer  |
| 20     | F/38            | SLE             | DLBCL       | +   | small<br>bowel                                | 215          | Pred+CsA+Ever                | -      | Surgery +<br>R-CHOP (CR) | Alive (54)          |

(Continued)

| Patent | Gender/<br>age (Tx) | Primary<br>disease | Histology        | EBV | Sites               | Time<br>(month) | IS           | Reject | Treatment<br>(remission) | Outcome<br>(month) |
|--------|---------------------|--------------------|------------------|-----|---------------------|-----------------|--------------|--------|--------------------------|--------------------|
| 21     | M/28                | unknown            | DLBCL            | +   | brain               | 236             | Pred+MMF+CsA | -      | RT (NR)                  | Died (1)<br>sepsis |
| 22     | M/35                | GN                 | Marginal<br>zone | +   | LN                  | 250             | Pred+Aza+CsA | +      | Reduce IS (CR)           | Alive (65)         |
| 23     | M/44                | HT                 | Burkitt          | -   | soft tissue<br>mass | 252             | Aza+CsA      | -      | RT + R-CHOP<br>(CR)      | Died (9)<br>sepsis |

PTLD: post-transplant lymphoproliferative disorders; Age (Tx): age at transplant; EBV: Epstein-Barr virus status of tissue; Time (month): time from transplant to onset of PTLT (months); IS: immunosuppression; Reject: history of rejection before PTLT; Outcome (month): outcome of treatment including cause of death and time from onset of PTLT to time of death or 31/12/2016.

M: male; F: female; GN: glomerulonephritis; HT: hypertension; SLE: systemic lupus erythematosus; DLBCL: diffuse large B cell lymphoma; Polymorphic: polymorphic PTLT; NK cell: NK cell lymphoma; Mantle cell: mantle cell lymphoma; T cell: peripheral T cell lymphoma; myeloma: plasma cell myeloma; ND: not determined; LN: lymph node; NP: nasopharynx; BM: bone marrow; Pred: prednisolone; Aza: azathioprine; MMF: mycophenolate mofetil; CsA: cyclosporine A; Tac: tacrolimus; siro: sirolimus; ever: everolimus; ATG: anti-thymocyte globulin; RT: radiotherapy; R: rituximab; CHOP: cyclophosphamide, doxorubicin, vincristine, prednisolone; CR: complete remission; NR: no remission; PR: partial remission; IHD: ischemic heart disease.

confidence interval 14.0-23.8) [4]. Since PTLT is such an important comorbidity after kidney transplant, we performed this retrospective cohort study in order to characterize the PTLT into subgroups according to the EBV status, histology, site of occurrence and the clinical outcome in our kidney transplant recipients. In fact our study reports the largest cohort of Asian patients with PTLT to date.

Previous study reported that PTLT occurred at a median of 6 months after solid organ transplantation [20], although recent data show that this interval has increased to 48-81 months [11, 21]. In our cohort, the median time from transplantation to PTLT diagnosis was even longer (104 months). As a result, a higher portion of our PTLT cohort belonged to the late PTLT group when compared with other study (73.9% vs 60%) [11]. In addition, 43% of the PTLT patients in our cohort, as opposed to only 15-30% in other series, were diagnosed to have PTLT more than 10 years after transplant [11, 21]. Late PTLT is becoming more common in kidney transplant recipients because of the improved patient and graft survival in recent years. Early PTLT was associated with pre-transplant EBV seronegativity and use of T cell-depleting antibodies. On the other hand, late PTLT was associated with the prolonged use of potent immunosuppressive agents such as CNI [22]. Recognition of late PTLT is important because it has been shown to be associated with poor prognosis in different studies [2, 12, 23].

Although there is a strong association between EBV and PTLT, different studies showed that up to 33-48% of PTLT were EBV-negative [9, 10]. In our cohort, approximately 43% of PTLT cases were EBV-negative.

However, none of these EBV-negative cases occurred within the first year of transplant. Similar to other series [9-11, 21], EBV-negative PTLT seems to present late after transplant when compared with the EBV-positive cases (104 vs 60 months). Some studies reported that EBV-negativity was associated with poor response to rituximab treatment and inferior patient survival [12, 16]. However similar association was not shown in other retrospective and prospective studies [10, 11, 13-15]. Luskin et al. found that the EBV status had no significant impact on patient survival and response to initial PTLT therapy [10]. In our study, we also could not show any significant difference in the overall survival of PTLT patients with EBV-negative versus EBV-positive disease.

Minimization of immunosuppression is the mainstay of treatment after PTLT diagnosis. However, there is no consensus on how the immunosuppressive drugs should be adjusted. One commonly used strategy is to eliminate the CNI completely. However, Serre et al. showed that maintaining CNI at a lower dose after PTLT could reduce the risk of developing de novo anti-HLA antibodies and humoral rejection while absence of CNI in the maintenance immunosuppressive regimen was an independent risk factors for allograft loss. In addition, CNI maintenance was neither associated with worse progression-free survival nor higher mortality [24]. mTOR inhibitor has both immunosuppressive and antitumor effects. It was able to suppress growth of cells derived from PTLT *in vitro* at a dose that could prevent allograft rejection [25]. Total 15 patients were on mTOR inhibitors after PTLT (4 on mTOR inhibitors before PTLT and 11 converted from azathioprine/mycophenolate) together with CNI minimization

**Table 3: Patient demographics and clinical characteristics stratified by EBV status**

|                                                  | EBV-positive<br>(n=12) | EBV-negative<br>(n=9) | P value |
|--------------------------------------------------|------------------------|-----------------------|---------|
| Male, n (%)                                      | 6 (50.0)               | 6 (66.7)              | 0.66    |
| Deceased / living, n (%)                         | 11 (91.7)              | 7 (77.8)              | 0.55    |
| Mean age at transplant (years)                   | 37.8 +/- 10.1          | 44.6 +/- 11.4         | 0.16    |
| Mean age at PTLD (years)                         | 46.3 +/- 12.4          | 54.3 +/- 14.0         | 0.18    |
| Median duration from transplant to PTLD (months) | 60 (5-250)             | 104 (23-252)          | 0.48    |
| Extranodal disease, n (%)                        | 11 (91.7)              | 9 (100)               | 1.00    |
| Central nervous system, n (%)                    | 4 (33.3)               | 0 (0)                 | 0.10    |
| Bone marrow involvement, n (%)                   | 2 (16.7)               | 5 (55.6)              | 0.16    |
| Graft involvement, n (%)                         | 2 (16.7)               | 0 (0)                 | 0.49    |
| Ann Arbor stage, n (%)                           |                        |                       | 0.64    |
| I/II                                             | 5 (41.7)               | 2 (22.2)              |         |
| III/IV                                           | 7 (58.3)               | 7 (77.8)              |         |
| PTLD subtype, n (%)                              |                        |                       | 0.99    |
| Polymorphic PTLD                                 | 1 (8.3)                | 0 (0)                 |         |
| DLBCL                                            | 9 (75.0)               | 6 (66.7)              |         |
| Burkitt lymphoma                                 | 0 (0)                  | 1 (11.1)              |         |
| Mantle cell lymphoma                             | 0 (0)                  | 1 (11.1)              |         |
| NK cell lymphoma                                 | 1 (8.3)                | 0 (0)                 |         |
| Peripheral T cell lymphoma                       | 0 (0)                  | 1 (11.1)              |         |
| Marginal zone lymphoma                           | 1 (8.3)                | 0 (0)                 |         |
| Immunosuppression at diagnosis, n (%)            |                        |                       |         |
| Prednisolone                                     | 12 (100)               | 7 (77.8)              | 0.17    |
| Azathioprine                                     | 4 (33.3)               | 4 (44.4)              | 0.67    |
| Mycophenolate mofetil                            | 4 (33.3)               | 3 (33.3)              | 1.00    |
| Cyclosporine A                                   | 9 (75.0)               | 6 (66.7)              | 1.00    |
| Tacrolimus                                       | 3 (25.0)               | 3 (33.3)              | 1.00    |
| Sirolimus                                        | 1 (8.3)                | 0 (0)                 | 1.00    |
| Everolimus                                       | 2(16.7)                | 0 (0)                 | 0.49    |
| Use of Rituximab in PTLD treatment, n (%)        | 5 (41.7)               | 6 (66.7)              | 0.38    |

Values expressed as mean  $\pm$ SD, median (range) or number (percentage).

DLBCL: diffuse large B cell lymphoma; PTLD: post-transplant lymphoproliferative disorders.

or elimination. None of the patients in our cohort developed acute or chronic rejection after PTLD. With the low number of patients on mTOR inhibitors and limited follow-up duration, it remains to be seen whether conversion to mTOR inhibitors after PTLD development can have any benefit in the long-term patient and graft survival.

The treatment response rate and the patient survival varied widely among different studies. In our cohort, the overall treatment response rate was around 52%, which was comparable with other large studies [10, 21, 23]. However, the mortality was high when compared with other series [2, 11, 21]. Many patients died of infection shortly after chemotherapy. It may be worthwhile to have a greater reduction of immunosuppression during the treatment phase even though there is a higher risk of acute rejection. Moreover, there were different poor prognostic factors in our cohort. Extranodal disease was present in almost all patients. Bone marrow involvement was the most common extranodal site of PTLD in our study (30.4%), which was followed by brain and gastrointestinal tract involvement (17.4%). Different studies have reported that central nervous system and bone marrow involvement are 2 important poor prognostic factors of PTLD [2, 10, 11]. Moreover, more than 90% of PTLD cases in our series were monomorphic disease which was also another well-known prognostic indicator [12, 19, 26]. Finally, approximately 70% of the patients in our study presented with late-stage disease (Stage III and IV).

This study had several strengths. Firstly, all cases of PTLD were captured from the Hong Kong Renal Registry which was an accurate and up-to-date record of all comorbidities and complications of patients receiving renal replacement therapy in Hong Kong under HA. The diagnosis of PTLD was subsequently verified with the histology and other relevant information from the patients' medical record. Secondly, we covered all kidney transplant recipients in 2 large transplant centers in Hong Kong over 2 decades, resulting in over 1200 adult kidney transplants included. Moreover, prolonged follow-up duration also enabled us to include those patients with very late PTLD (onset >10 years after transplant). Finally, EBV *in situ* hybridization results were available in nearly all biopsy samples in our cohort. Despite of these, our study also had some limitations. The retrospective nature of the study, the small number of patients diagnosed to have PTLD and the lack of uniform treatment assignment over 20 years have limited our ability to determine the significant risk factors and the prognostic indicators of various subgroups of PTLD in our population.

In conclusion, late PTLD is common and has become an important comorbidity in kidney transplant recipients. Careful adjustment of immunosuppression, close monitoring of patients, increased awareness and

early detection of the disease are required. Prospective studies involving more patients, longer follow-up duration and standardized treatment protocol are necessary for further understanding the different subtypes of PTLD including the appropriate treatment in our population.

## MATERIALS AND METHODS

This was a retrospective cohort study of all adult kidney transplant recipients ( $\geq 18$  years old) who had been followed up in the two large transplant centers in Hong Kong, namely Queen Elizabeth Hospital and Queen Mary Hospital, between the period 1<sup>st</sup> January 1994 and 30<sup>th</sup> June 2015 and were diagnosed to have PTLD. The diagnosis of PTLD was confirmed by histological assessment on incisional/excisional biopsies or resection of tissues. Bone marrow involvement was determined by bone marrow aspiration and trephine biopsy. The cases were then reviewed and classified according to the 2008 WHO classification: (1) early lesions (plasmacytic hyperplasia and infectious mononucleosis-like PTLD); (2) polymorphic PTLD; (3) monomorphic PTLD (B cell and T cell/NK cell types) and (4) classical Hodgkin lymphoma type PTLD (1). Since we would like to study all lymphomas and early PTLD in the kidney transplant recipients, indolent lymphomas were also included in our study although they are not defined as PTLD according to WHO classification. In addition, *in-situ* hybridization for EBV-encoded RNAs (EBER) was performed to confirm diagnosis of EBV-associated disease. Clinical stage was defined according to Ann Arbor criteria. Early PTLD was defined as PTLD diagnosed within the first year of transplantation while all other cases were defined as late PTLD.

All patients with PTLD were identified from the Hong Kong Renal Registry database. The Renal Registry is a direct, online, computerized registry system developed by the Central Renal Committee, Hospital Authority (HA), to collect data of all patients who received renal replacement therapy under HA. The data is entered directly by renal doctors or nurses of the individual renal unit and each unit can access their own patient data [27]. All basic demographic and clinical data were extracted from patients' medical record. This study was approved by the research ethics committee.

All patients received calcineurin inhibitor (CNI), either tacrolimus or cyclosporine, as part of the maintenance immunosuppressive regimen after kidney transplant. When cancer was diagnosed, the dose of immunosuppressive drugs would be reduced. Since 2006, those patients with cancers would have their immunosuppressive regimen converted to inhibitor of mammalian target of rapamycin (mTOR inhibitor, either sirolimus or everolimus) – based therapy which consisted of abrupt withdrawal of either mycophenolate



or azathioprine together with CNI minimization or elimination. However, mTOR inhibitor would not be prescribed for those who refused conversion therapy. When PTLTD was diagnosed, the target cyclosporine trough level was 50-80 ng/mL and the target tacrolimus trough level was 3-5 ng/mL. For mTOR inhibitor titration, the target sirolimus trough level was maintained at 5-10 ng/mL while the target everolimus trough level was 3-8 ng/mL.

SPSS (SPSS 20.0, Inc., Chicago, IL USA) was used to perform the statistical analyses. Categorical data was expressed as percentages while continuous data was expressed as mean +/- standard deviation (SD) or median (range). Categorical data were compared with chi-square or Fisher's exact tests while continuous data were compared with t-test or Mann-Whitney U test. Patient survival was calculated from the time of PTLTD diagnosis to the time of death or 31<sup>st</sup> December 2016. Graft survival was calculated from the time of PTLTD to the time of resumption of dialysis or patient death or 31<sup>st</sup> December 2016. Kaplan-Meier method was used to plot survival and log-rank test was used to compare the survival between groups. P value <0.05 was considered statistically significant in this study.

### Authors' contributions

Chi Yuen Cheung, Maggie Kam Man Ma, Ka Foon Chau, Wai Leung Chak collected, analyzed and interpreted the patient data. Chi Yuen Cheung and Sydney Chi Wai Tang were major contributors in writing the manuscript.

All authors read and approved the final manuscript.

### CONFLICTS OF INTEREST

The author declare no conflicts of interest.

### REFERENCES

1. Campo E, Swerdlow SH, Harris NL, Pileri S, Stein H, Jaffe ES. The 2008 WHO classification of lymphoid neoplasms and beyond: evolving concepts and practical applications. *Blood*. 2011; 117:5019-32.
2. Caillard S, Lamy FX, Quelen C, Dantal J, Lebranchu Y, Lang P, Velten M, Moulin B; French Transplant Centers. Epidemiology of posttransplant lymphoproliferative disorders in adult kidney and kidney pancreas recipients: report of the French registry and analysis of subgroups of lymphomas. *Am J Transplant*. 2012; 12:682-93.
3. O'Regan JA, Prendeville S, McCaughan JA, Traynor C, O'Brien FJ, Ward FL, O'Donovan D, Kennedy C, Berzan E, Kinsella S, Williams Y, O'Kelly P, Deady S, et al. Posttransplant lymphoproliferative disorders in irish renal transplant recipients: insights from a national observational study. *Transplantation*. 2017; 101:657-63.
4. Cheung CY, Lam MF, Chu KH, Chow KM, Tsang KY, Yuen SK, Wong PN, Chan SK, Leung KT, Chan CK, Ho YW, Chau KF. Malignancies after kidney transplantation: Hong Kong renal registry. *Am J Transplant*. 2012; 12:3039-46.
5. Adami J, Gäbel H, Lindelöf B, Ekström K, Rydh B, Glimelius B, Ekblom A, Adami HO, Granath F. Cancer risk following organ transplantation: a nationwide cohort study in Sweden. *Br J Cancer*. 2003; 89:1221-7.
6. Villeneuve PJ, Schaubel DE, Fenton SS, Shepherd FA, Jiang Y, Mao Y. Cancer incidence among Canadian kidney transplant recipients. *Am J Transplant*. 2007; 7:941-8.
7. Faull RJ, Hollett P, McDonald SP. Lymphoproliferative disease after renal transplantation in Australia and New Zealand. *Transplantation*. 2005; 80:193-7.
8. Ishihara H, Shimizu T, Unagami K, Hirai T, Toki D, Omoto K, Okumi M, Imai Y, Ishida H, Tanabe K. Post-transplant lymphoproliferative disorder in kidney transplant recipients: a single-center experience in Japan. *Ther Apher Dial*. 2016; 20:165-73.
9. Dierickx D, Tousseyn T, Gheysens O. How I treat posttransplant lymphoproliferative disorders. *Blood*. 2015; 126:2274-83.
10. Luskin MR, Heil DS, Tan KS, Choi S, Stadtmauer EA, Schuster SJ, Porter DL, Vonderheide RH, Bagg A, Heitjan DF, Tsai DE, Reshef R. The impact of EBV status on characteristics and outcomes of posttransplantation lymphoproliferative disorders. *Am J Transplant*. 2015; 15:2665-73.
11. Evens AM, David KA, Helenowski I, Nelson B, Kaufman D, Kircher SM, Gimelfarb A, Hattersley E, Mauro LA, Jovanovic B, Chadburn A, Stiff P, Winter JN, et al. Multicenter analysis of 80 solid organ transplantation recipients with post-transplantation lymphoproliferative disease: outcomes and prognostic factors in the modern era. *J Clin Oncol*. 2010; 28:1038-46.
12. Leblond V, Dhedin N, Mamzer Bruneel MF, Choquet S, Hermine O, Porcher R, Nguyen Quoc S, Davi F, Charlotte F, Dorent R, Barrou B, Vernant JP, Raphael M, Levy V. Identification of prognostic factors in 61 patients with posttransplantation lymphoproliferative disorders. *J Clin Oncol*. 2001; 19:772-8.
13. Ghobrial IM, Habermann TM, Macon WR, Ristow KM, Larson TS, Walker RC, Ansell SM, Gores GJ, Stegall MD, McGregor CG. Differences between early and late posttransplant lymphoproliferative disorders in solid organ transplant patients: are

- they two different diseases? *Transplantation*. 2005; 79:244-7.
14. Morscio J, Dierickx D, Ferreiro JF, Herreman A, Van Loo P, Bittoun E, Verhoef G, Matthys P, Cools J, Wlodarska I, De Wolf-Peters C, Sagaert X, Tousseyn T. Gene expression profiling reveals clear differences between EBV-positive and EBV-negative posttransplant lymphoproliferative disorders. *Am J Transplant*. 2013; 13:1305-16.
  15. Trappe R, Oertel S, Leblond V, Mollee P, Sender M, Reinke P, Neuhaus R, Lehmkühl H, Horst HA, Salles G, Morschhauser F, Jaccard A, Lamy T, et al. Sequential treatment with rituximab followed by CHOP chemotherapy in adult B-cell post-transplant lymphoproliferative disorder (PTLD): the prospective international multicentre phase 2 PTL-D-1 trial. *Lancet Oncol*. 2012; 13:196-206.
  16. Oertel SH, Verschuuren E, Reinke P, Zeidler K, Papp-Váry M, Babel N, Trappe RU, Jonas S, Hummel M, Anagnostopoulos I, Dörken B, Riess HB. Effect of anti-CD 20 antibody rituximab in patients with post-transplant lymphoproliferative disorder (PTLD). *Am J Transplant*. 2005; 5:2901-6.
  17. Au WY, Lie AK, Kwong YL, Shek TW, Hawkins BR, Lai KN, Tang SC, Lo CM, Fan ST, Liu CL, Chan GC, Chau EM, Chiu SW, et al. Post-transplantation lymphoproliferative disease in Chinese: the Queen Mary Hospital experience in Hong Kong. *Leuk Lymphoma*. 2002; 43:1403-7.
  18. Chan TS, Hwang YY, Gill H, Au WY, Leung AY, Tse E, Chim CS, Loong F, Kwong YL. Post-transplant lymphoproliferative diseases in Asian solid organ transplant recipients: late onset and favorable response to treatment. *Clin Transplant*. 2012; 26:679-83.
  19. Abe T, Ichimaru N, Kokado Y, Maeda T, Kakuta Y, Okumi M, Imamura R, Nonomura N, Isaka Y, Takahara S, Okuyama A. Post-transplant lymphoproliferative disorder following renal transplantation: a single-center experience over 40 years. *Int J Urol*. 2010; 17:48-54.
  20. Opelz G, Henderson R. Incidence of non-Hodgkin lymphoma in kidney and heart transplant recipients. *Lancet*. 1993; 342:1514-6.
  21. Morton M, Coupes B, Roberts SA, Klapper PE, Byers RJ, Vallely PJ, Ryan K, Picton ML. Epidemiology of posttransplantation lymphoproliferative disorder in adult renal transplant recipients. *Transplantation*. 2013; 95:470-8.
  22. van Leeuwen MT, Grulich AE, Webster AC, McCredie MR, Stewart JH, McDonald SP, Amin J, Kaldor JM, Chapman JR, Vajdic CM. Immunosuppression and other risk factors for early and late non-Hodgkin lymphoma after kidney transplantation. *Blood*. 2009; 114:630-7.
  23. Dotti G, Fiocchi R, Motta T, Mammana C, Gotti E, Riva S, Cornelli P, Gridelli B, Viero P, Oldani E, Ferrazzi P, Remuzzi G, Barbui T. Lymphomas occurring late after solid-organ transplantation: influence of treatment on the clinical outcome. *Transplantation*. 2002; 74:1095-102.
  24. Serre JE, Michonneau D, Bachy E, Noël LH, Dubois V, Suberbielle C, Kreis H, Legendre C, Mamzer-Bruneel MF, Morelon E, Thaunat O. Maintaining calcineurin inhibition after the diagnosis of post-transplant lymphoproliferative disorder improves renal graft survival. *Kidney Int*. 2014; 85:182-90.
  25. Majewski M, Korecka M, Joergensen J, Fields L, Kossev P, Schuler W, Shaw L, Wasik MA. Immunosuppressive TOR kinase inhibitor everolimus (RAD) suppresses growth of cells derived from posttransplant lymphoproliferative disorder at allograft-protecting doses. *Transplantation*. 2003; 75:1710-7.
  26. Ghobrial IM, Habermann TM, Maurer MJ, Geyer SM, Ristow KM, Larson TS, Walker RC, Ansell SM, Macon WR, Gores GG, Stegall MD, McGregor CG. Prognostic analysis for survival in adult solid organ transplant recipients with post-transplantation lymphoproliferative disorders. *J Clin Oncol*. 2005; 23:7574-82.
  27. Leung CB, Cheung WL, Li PK. Renal registry in Hong Kong-the first 20 years. *Kidney Int Suppl*. 2015; 5:33-8.
